# Supplementary material
Source: Springer Nature journal article supplement (https://www.springermedizin.de/resource/supplementary/12877_2011_744_MOESM4_ESM.pdf/9440242)

Number of patients

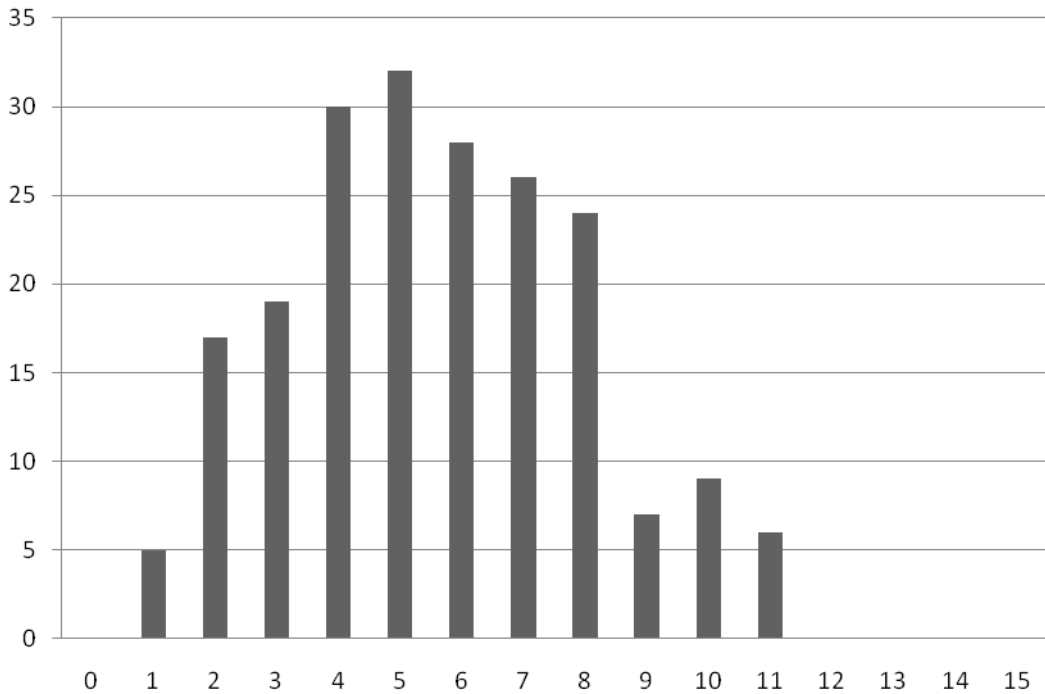

SDAT Scores

Supplement: MOESM4 [file 9440242]
